# Supplementary Material for: Towards a new history and geography of human genes informed by ancient DNA

Joseph K. Pickrell<sup>1,2\*</sup>, David Reich<sup>3,4,5\*</sup>

<sup>1</sup>New York Genome Center, New York, NY

<sup>2</sup>Department of Biological Sciences, Columbia University, New York, NY

<sup>3</sup>Department of Genetics, Harvard Medical School, Boston, MA

<sup>4</sup>Howard Hughes Medical Institute, Harvard Medical School, Boston, MA

<sup>5</sup>Broad Institute of MIT and Harvard, Cambridge, MA

\*To whom correspondence should be addressed: [jkpickrell@nygenome.org](mailto:jkpickrell@nygenome.org) (JKP),  
[reich@genetics.med.harvard.edu](mailto:reich@genetics.med.harvard.edu) (DR)



```

23 -em 0.001475 3 1 36363.6363636 -ej 0.0015 3 23 -em 0.001475 4 1
34545.4545455 -ej 0.0015 4 23 -em 0.001475 5 1 32727.2727273 -ej 0.0015
5 23 -em 0.001475 6 1 30909.0909091 -ej 0.0015 6 23 -em 0.001475 7 1
29090.9090909 -ej 0.0015 7 23 -em 0.001475 8 1 27272.7272727 -ej 0.0015
8 23 -em 0.001475 9 1 25454.5454545 -ej 0.0015 9 23 -em 0.001475 10 1
23636.3636364 -ej 0.0015 10 23 -em 0.001475 11 1 21818.1818182 -ej
0.0015 11 23 -em 0.001475 12 1 20000.0 -ej 0.0015 12 23 -em 0.001475 13
1 18181.8181818 -ej 0.0015 13 23 -em 0.001475 14 1 16363.6363636 -ej
0.0015 14 23 -em 0.001475 15 1 14545.4545455 -ej 0.0015 15 23 -em
0.001475 16 1 12727.2727273 -ej 0.0015 16 23 -em 0.001475 17 1
10909.0909091 -ej 0.0015 17 23 -em 0.001475 18 1 9090.90909091 -ej
0.0015 18 23 -em 0.001475 19 1 7272.72727273 -ej 0.0015 19 23 -em
0.001475 20 1 5454.54545455 -ej 0.0015 20 23 -em 0.001475 21 1
3636.36363636 -ej 0.0015 21 23 -em 0.001475 22 1 1818.18181818 -ej
0.0015 22 23 -em 0.001475 24 23 38181.8181818 -ej 0.0015 24 45 -em
0.001475 25 23 36363.6363636 -ej 0.0015 25 45 -em 0.001475 26 23
34545.4545455 -ej 0.0015 26 45 -em 0.001475 27 23 32727.2727273 -ej
0.0015 27 45 -em 0.001475 28 23 30909.0909091 -ej 0.0015 28 45 -em
0.001475 29 23 29090.9090909 -ej 0.0015 29 45 -em 0.001475 30 23
27272.7272727 -ej 0.0015 30 45 -em 0.001475 31 23 25454.5454545 -ej
0.0015 31 45 -em 0.001475 32 23 23636.3636364 -ej 0.0015 32 45 -em
0.001475 33 23 21818.1818182 -ej 0.0015 33 45 -em 0.001475 34 23
20000.0 -ej 0.0015 34 45 -em 0.001475 35 23 18181.8181818 -ej 0.0015 35
45 -em 0.001475 36 23 16363.6363636 -ej 0.0015 36 45 -em 0.001475 37 23
14545.4545455 -ej 0.0015 37 45 -em 0.001475 38 23 12727.2727273 -ej
0.0015 38 45 -em 0.001475 39 23 10909.0909091 -ej 0.0015 39 45 -em
0.001475 40 23 9090.90909091 -ej 0.0015 40 45 -em 0.001475 41 23
7272.72727273 -ej 0.0015 41 45 -em 0.001475 42 23 5454.54545455 -ej
0.0015 42 45 -em 0.001475 43 23 3636.36363636 -ej 0.0015 43 45 -em
0.001475 44 23 1818.18181818 -ej 0.0015 44 45 -en 0.02725 45 0.0025 -ej
0.0275 45 23 -en 0.05475 23 0.0025 -ej 0.055 23 1

```

In the demographic model in Figure 1C, there are three ancestral populations, two of which have admixed with an archaic population in different proportions. All observed populations are mixtures (in different proportions) of two of these populations. To simulate this scenario, we used the following command. The output of this command is 20 haplotypes from 46 populations (the archaic population, the three ancestral populations and the 42 observed populations). For plotting purposes, we ignore the archaic population and the three ancestral populations (populations 0, 22, 44 and 45 in the command):

```

ms 920 1 -t 100 -r 10 100000 -I 46 20 20 20 20 20 20 20 20 20 20 20 20 20
20 20 20 20 20 20 20 20 20 20 20 20 20 20 20 20 20 20 20 20 20 20 20
20 20 20 20 20 20 20 20 20 20 -em 0.001475 2 1 38181.8181818 -ej 0.0015
2 23 -em 0.001475 3 1 36363.6363636 -ej 0.0015 3 23 -em 0.001475 4 1
34545.4545455 -ej 0.0015 4 23 -em 0.001475 5 1 32727.2727273 -ej 0.0015
5 23 -em 0.001475 6 1 30909.0909091 -ej 0.0015 6 23 -em 0.001475 7 1
29090.9090909 -ej 0.0015 7 23 -em 0.001475 8 1 27272.7272727 -ej 0.0015
8 23 -em 0.001475 9 1 25454.5454545 -ej 0.0015 9 23 -em 0.001475 10 1
23636.3636364 -ej 0.0015 10 23 -em 0.001475 11 1 21818.1818182 -ej
0.0015 11 23 -em 0.001475 12 1 20000.0 -ej 0.0015 12 23 -em 0.001475 13
1 18181.8181818 -ej 0.0015 13 23 -em 0.001475 14 1 16363.6363636 -ej
0.0015 14 23 -em 0.001475 15 1 14545.4545455 -ej 0.0015 15 23 -em
0.001475 16 1 12727.2727273 -ej 0.0015 16 23 -em 0.001475 17 1
10909.0909091 -ej 0.0015 17 23 -em 0.001475 18 1 9090.90909091 -ej

```

0.0015 18 23 -em 0.001475 19 1 7272.72727273 -ej 0.0015 19 23 -em  
0.001475 20 1 5454.54545455 -ej 0.0015 20 23 -em 0.001475 21 1  
3636.36363636 -ej 0.0015 21 23 -em 0.001475 22 1 1818.18181818 -ej  
0.0015 22 23 -em 0.001475 24 23 38181.81818181 -ej 0.0015 24 45 -em  
0.001475 25 23 36363.63636363 -ej 0.0015 25 45 -em 0.001475 26 23  
34545.4545455 -ej 0.0015 26 45 -em 0.001475 27 23 32727.2727273 -ej  
0.0015 27 45 -em 0.001475 28 23 30909.0909091 -ej 0.0015 28 45 -em  
0.001475 29 23 29090.9090909 -ej 0.0015 29 45 -em 0.001475 30 23  
27272.7272727 -ej 0.0015 30 45 -em 0.001475 31 23 25454.5454545 -ej  
0.0015 31 45 -em 0.001475 32 23 23636.3636364 -ej 0.0015 32 45 -em  
0.001475 33 23 21818.1818182 -ej 0.0015 33 45 -em 0.001475 34 23  
20000.0 -ej 0.0015 34 45 -em 0.001475 35 23 18181.8181818 -ej 0.0015 35  
45 -em 0.001475 36 23 16363.6363636 -ej 0.0015 36 45 -em 0.001475 37 23  
14545.4545455 -ej 0.0015 37 45 -em 0.001475 38 23 12727.2727273 -ej  
0.0015 38 45 -em 0.001475 39 23 10909.0909091 -ej 0.0015 39 45 -em  
0.001475 40 23 9090.90909091 -ej 0.0015 40 45 -em 0.001475 41 23  
7272.72727273 -ej 0.0015 41 45 -em 0.001475 42 23 5454.54545455 -ej  
0.0015 42 45 -em 0.001475 43 23 3636.36363636 -ej 0.0015 43 45 -em  
0.001475 44 23 1818.18181818 -ej 0.0015 44 45 -em 0.02 23 46 4000 -em  
0.020025 23 46 0 -em 0.02 1 46 20000 -em 0.020025 1 46 0 -ej 0.0275 45  
23 -ej 0.055 23 1 -ej 1 46 1

**Admixture tests.** To generate Figure 2, we combined SNP data generated on Illumina chips from a number of sources (Li et al., 2008; Altshuler et al., 2010; Behar et al., 2010; Henn et al., 2011; Schlebusch et al., 2012). We excluded the Jewish populations from Behar et al. 2010. In total, the data set consisted of 103 populations and 256,540 SNPs (Supplementary Table 1).

We used ADMIXTOOLS (Patterson et al., 2012) to compute all possible  $f_3$ -statistics of the form  $f_3(A; B, C)$  on these populations. We considered an  $f_3$ -statistic to be significant evidence for admixture in population A if it was at least three standard errors less than zero (corresponding to a P-value of about 0.001). In Supplementary Table 1, we list all populations, their approximate latitudes and longitudes, and the representatives of the admixing populations (if any). These representatives were chosen as the population pair B and C that give the minimum  $f_3$ -statistic.

**Table 1: Populations used in tests for admixture**

| Panel  | Population    | Country  | Region | Lat   | Long  | P1            | P2        |
|--------|---------------|----------|--------|-------|-------|---------------|-----------|
| Pagani | AFAR          | Ethiopia | EASTAF | 12    | 41    | Sardinian     | SUDANESE  |
| Pagani | AMHARA        | Ethiopia | EASTAF | 10    | 39    | Sardinian     | SUDANESE  |
| Pagani | ANUAK         | Ethiopia | EASTAF | 8     | 34    | ARIBLACKSMITH | SUDANESE  |
| Pagani | ARIBLACKSMITH |          |        |       |       |               |           |
| Pagani | H             | Ethiopia | EASTAF | 6     | 37    | NA            | NA        |
| Pagani | ARICULTIVATO  |          |        |       |       |               |           |
| Pagani | R             | Ethiopia | EASTAF | 6     | 39    | Sardinian     | Juhoansi  |
| Pagani | ESOMALI       | Ethiopia | EASTAF | 9     | 42    | Sardinian     | SUDANESE  |
| Pagani | GUMUZ         | Ethiopia | EASTAF | 10.78 | 35.57 | NA            | NA        |
| Pagani | OROMO         | Ethiopia | EASTAF | 8     | 37    | Sardinian     | SUDANESE  |
| Pagani | SOMALI        | Ethiopia | EASTAF | 5.15  | 46.2  | Sardinian     | SUDANESE  |
| Pagani | SUDANESE      | Sudan    | EASTAF | 12.86 | 30.21 | NA            | NA        |
| Pagani | TYGRAY        | Ethiopia | EASTAF | 9     | 38    | Sardinian     | SUDANESE  |
| Pagani | WOLAYTA       | Ethiopia | EASTAF | 6     | 37    | MbutiPygmy    | Sardinian |

|        |                    |                 |            |       |       |             |                  |
|--------|--------------------|-----------------|------------|-------|-------|-------------|------------------|
| Henn   | Khomani            | SouthAfrica     | SAF        | 26.97 | 20.79 | Juhoansi    | Belorussians     |
| KSP    | Khwe               | Angola          | SAF        | -17.4 | 22.95 | Mozabite    | Juhoansi         |
| KSP    | Xun                | Angola          | SAF        | -14.6 | 17.66 | Yoruba      | Juhoansi         |
| KSP    | GuiGana            | Botswana        | SAF        | -23.6 | 24.66 | Yoruba      | Juhoansi         |
| KSP    | Juhoansi           | Namibia         | SAF        | 19.59 | 20.49 | NA          | NA               |
| KSP    | Nama               | Namibia         | SAF        | 22.55 | 17.07 | Basque      | Juhoansi         |
| KSP    | Karretjie          | SouthAfrica     | SAF        | 30.71 | 25.10 | Russian     | Juhoansi         |
| Hgdp   | BiakaPygmy         | CAR             | CAF        | 4     | 17    | NA          | NA               |
| Hgdp   | MbutiPygmy         | Congo           | CAF        | 1     | 29    | NA          | NA               |
| Henn   | HADZA              | Tanzania        | EASTAF     | -3.38 | 36.68 | NA          | NA               |
| Henn   | SANDAWÉ            | Tanzania        | EASTAF     | -6.18 | 35.74 | Sardinian   | Juhoansi         |
| HapMap | LWK                | Kenya           | EASTAF     | 0.61  | 34.76 | BiakaPygmy  | Sardinian        |
| Hgdp   | BantuKenya         | Kenya           | EASTAF     | -3    | 37    | BiakaPygmy  | Samaritians      |
| Hgdp   | BantuSouthAfrica   | SouthAfrica     | SAF        | -21   | 18.7  | YRI         | Juhoansi         |
| HapMap | YRI                | Nigeria         | WAF        | 8     | 5     | NA          | NA               |
| Hgdp   | Yoruba             | Nigeria         | WAF        | 8     | 5     | NA          | NA               |
| Hgdp   | Mandenka           | Senegal         | WAF        | 12    | -12   | NA          | NA               |
| HapMap | MKK                | Kenya           | EASTAF     | -1.32 | 36.82 | MbutiPygmy  | Sardinian        |
| KSP    | ColouredWellington | SouthAfrica     | SAF        | -33.6 | 19.01 | Russian     | Juhoansi         |
| Hgdp   | Mozabite           | Algeria-Mزاب    | MIDDLEEAST | 32    | 3     | YRI         | Sardinian        |
| Hgdp   | Druze              | Israel-Carmel   | MIDDLEEAST | 32    | 35    | NA          | NA               |
| Hgdp   | Palestinian        | Israel-Central  | MIDDLEEAST | 32    | 35    | Yoruba      | Sardinian        |
| Hgdp   | Bedouin            | Israel-Negev    | MIDDLEEAST | 31    | 35    | Sardinian   | SUDANESE         |
| HapMap | GIH                | India           | CSASIA     | 23    | 72    | Paniya      | Georgians        |
| Hgdp   | Uyгур              | China           | CSASIA     | 44    | 81    | Italian     | Japanese         |
| Hgdp   | Xibo               | China           | CSASIA     | 43.5  | 81.5  | Lithuanians | Japanese         |
| Hgdp   | Balochi            | Pakistan        | CSASIA     | 30.5  | 66.5  | Cypriots    | Paniya           |
| Hgdp   | Brahui             | Pakistan        | CSASIA     | 30.5  | 66.5  | Cypriots    | Paniya           |
| Hgdp   | Buruscho           | Pakistan        | CSASIA     | 36.5  | 74    | Georgians   | Naxi             |
| Hgdp   | Hazara             | Pakistan        | CSASIA     | 33.5  | 70    | Italian     | Japanese         |
| Hgdp   | Kalash             | Pakistan        | CSASIA     | 36    | 71.5  | NA          | NA               |
| Hgdp   | Makrani            | Pakistan        | CSASIA     | 26    | 64    | Legzins     | BantuSouthAfrica |
| Hgdp   | Pathan             | Pakistan        | CSASIA     | 33.5  | 70.5  | Samaritians | Karitiana        |
| Hgdp   | Sindhi             | Pakistan        | CSASIA     | 25.5  | 69    | Paniya      | Georgians        |
| HapMap | CEU                | CEPH            | NEUROPE    | 55    | -3    | Karitiana   | Sardinian        |
| HapMap | TSI                | Italy           | SEUROPE    | 43    | 11    | Karitiana   | Sardinian        |
| Hgdp   | French             | France          | NEUROPE    | 46    | 2     | Karitiana   | Sardinian        |
| Hgdp   | Basque             | France          | SEUROPE    | 43    | 0     | NA          | NA               |
| Hgdp   | Italian            | Italy           | SEUROPE    | 46    | 10    | Karitiana   | Sardinian        |
| Hgdp   | Sardinian          | Italy           | SEUROPE    | 40    | 9     | NA          | NA               |
| Hgdp   | Orcadian           | Orkney          | NEUROPE    | 59    | -3    | Karitiana   | Sardinian        |
| Hgdp   | Russian            | Russia          | NEUROPE    | 61    | 40    | Karitiana   | Sardinian        |
| Hgdp   | Adygei             | Russia-Caucasus | NEUROPE    | 44    | 39    | Karitiana   | Sardinian        |
| HapMap | CHB                | China           | EASTASIA   | 32.5  | 114   | Dai         | Daur             |

|        |               |              |            |       |       |             |             |
|--------|---------------|--------------|------------|-------|-------|-------------|-------------|
| HapMap | JPT           | Japan        | NEASTASIA  | 38    | 138   | NA          | NA          |
| Hgdp   | Cambodian     | Cambodia     | EASTASIA   | 12    | 105   | Dai         | Samaritians |
| Hgdp   | Dai           | China        | EASTASIA   | 21    | 100   | NA          | NA          |
| Hgdp   | Daur          | China        | NEASTASIA  | 48.5  | 124   | Han         | Yakut       |
| Hgdp   | Han           | China        | EASTASIA   | 32.5  | 114   | Dai         | Daur        |
| Hgdp   | Hezhen        | China        | NEASTASIA  | 47.5  | 133.5 | She         | Yakut       |
| Hgdp   | Lahu          | China        | EASTASIA   | 22    | 100   | NA          | NA          |
| Hgdp   | Miaozu        | China        | EASTASIA   | 28    | 109   | NA          | NA          |
| Hgdp   | Mongola       | China        | NEASTASIA  | 48.5  | 119   | Lithuanians | Japanese    |
| Hgdp   | Naxi          | China        | EASTASIA   | 26    | 100   | NA          | NA          |
| Hgdp   | Oroqen        | China        | NEASTASIA  | 50.5  | 126.5 | Han         | Yakut       |
| Hgdp   | She           | China        | EASTASIA   | 27    | 119   | NA          | NA          |
| Hgdp   | Tu            | China        | EASTASIA   | 36    | 101   | CEU         | Tujia       |
| Hgdp   | Tujia         | China        | EASTASIA   | 29    | 109   | Dai         | Hezhen      |
| Hgdp   | Yizu          | China        | EASTASIA   | 28    | 103   | NA          | NA          |
| Hgdp   | Japanese      | Japan        | EASTASIA   | 38    | 138   | NA          | NA          |
| Hgdp   | Yakut         | Siberia      | NEASTASIA  | 70    | 129.5 | NA          | NA          |
| Hgdp   | Melanesian    | Bougainville | OCEANIA    | -6    | 155   | NA          | NA          |
| Hgdp   | Papuan        | NewGuinea    | OCEANIA    | -4    | 143   | NA          | NA          |
| Hgdp   | Karitiana     | Brazil       | AMERICA    | -10   | -63   | NA          | NA          |
| Hgdp   | Surui         | Brazil       | AMERICA    | -11   | -62   | NA          | NA          |
| Hgdp   | Colombian     | Colombia     | AMERICA    | 3     | -68   | NA          | NA          |
| Hgdp   | Maya          | Mexico       | AMERICA    | 19    | -91   | Moroccans   | Surui       |
| Hgdp   | Pima          | Mexico       | AMERICA    | 29    | -108  | NA          | NA          |
| Behar  | Armenians     | Armenia      | CAUCASUS   | 40.07 | 45.04 | GIH         | Sardinian   |
| Behar  | Belorussians  | Belarus      | NEUROPE    | 53.71 | 27.95 | Karitiana   | Sardinian   |
| Behar  | Chuvaths      | Russia       | NEUROPE    | 55.56 | 46.93 | Oroqen      | Lithuanians |
| Behar  | Cypriots      | Cyprus       | SEUROPE    | 35.13 | 33.43 | Sardinian   | ANUAK       |
| Behar  | Egyptans      | Egypt        | NAFRICA    | 26.82 | 30.8  | Yoruba      | Sardinian   |
| Behar  | Georgians     | Georgia      | CAUCASUS   | 42.32 | 43.36 | NA          | NA          |
| Behar  | Hungarians    | Hungary      | NEUROPE    | 47.16 | 19.5  | Karitiana   | Sardinian   |
| Behar  | Iranians      | Iran         | MIDDLEEAST | 32.43 | 53.69 | Samaritians | Colombian   |
| Behar  | Jordanians    | Jordan       | MIDDLEEAST | 30.59 | 36.24 | Sardinian   | SUDANESE    |
| Behar  | Legzins       | Russia       | CAUCASUS   | 42.14 | 47.09 | Samaritians | Colombian   |
| Behar  | Lithuanians   | Lithuania    | NEUROPE    | 55.17 | 23.88 | NA          | NA          |
| Behar  | Moroccans     | Morocco      | NAFRICA    | 31.79 | -7.09 | Yoruba      | Sardinian   |
| Behar  | North_Kannadi | India        | CSASIA     | 10.85 | 76.27 | NA          | NA          |
| Behar  | Paniya        | India        | CSASIA     | 11.71 | 76.1  | NA          | NA          |
| Behar  | Romanians     | Romania      | NEUROPE    | 45.94 | 24.97 | Karitiana   | Sardinian   |
| Behar  | Sakilli       | India        | CSASIA     | 11.13 | 78.66 | NA          | NA          |
| Behar  | Samaritians   | Israel       | MIDDLEEAST | 32.07 | 34.78 | NA          | NA          |
| Behar  | Saudis        | SaudiArabia  | MIDDLEEAST | 23.89 | 45.08 | GuiGana     | Sardinian   |
| Behar  | Spaniards     | Spain        | SEUROPE    | 40.46 | -3.75 | Karitiana   | Sardinian   |
| Behar  | Syrians       | Syria        | MIDDLEEAST | 34.8  | 39    | MbutiPygmy  | Sardinian   |
| Behar  | Turks         | Turkey       | MIDDLEEAST | 38.96 | 35.24 | Karitiana   | Sardinian   |
| Behar  | Uzbeks        | Uzbekistan   | CAUCASUS   | 41.38 | 64.59 | Oroqen      | Sardinian   |
| Behar  | Yemenese      | Yemen        | MIDDLEEAST | 15.55 | 48.52 | MbutiPygmy  | Sardinian   |
